# Supplementary material for: Insights Into the Internal Dynamics of Natural Lahars From Analysis of 3-Component Broadband Seismic Signals at Volcán de Colima, Mexico
Source: Frontiers journal article supplement (doi:10.3389/feart.2020.542116), 2020-12-09
Supplement: Table_1.DOCX [file Table_1.DOCX]

***Supplementary Material***

**Insights into the internal dynamics of natural lahars from the analysis of 3-component broadband seismic signals**

Braden Walsh1,2, Velio Coviello3, Lucia Capra4, Jonathan Procter5, and Victor Márquez-Ramirez4

1Department of Earth Sciences, Uppsala University, Villavägen 16, Uppsala, 75236, Sweden; 2Centre of Natural Hazards and Disaster Science, Uppsala University, Villavägen 16, Uppsala, 75236, Sweden; 3Faculty of Science and Technology, Free University of Bozen-Bolzano, Bolzano, Italy; 4Centro de Geociencias, Universidad Nacional Autónoma de México, Campus Juriquila, 76230 Querétaro, México; 5Volcanic Risk Solutions, Institute of Agriculture and Environment, Massey University, Private Bag 11222, Palmerston North, 4442, New Zealand

**Contents of this file**

Movie S1 to S4

**Additional Supporting Information (Files uploaded separately)**

Captions for Movies S1 to S4

**Introduction**

The supplementary material further provides information on the four lahars that were recorded in 2016 on the Lumbre channel, Volcán de Colima, Mexico. The supplementary material includes a video for each lahar mentioned in the manuscript, including August 26 (Movie S1), August 29 (Movie S2), August 30 (Movie S3), and September 9 (Movie S4).

Movie S1. Movie of the August 26 2016 Lahar on Lumbre channel

Movie S2. Movie of the August 29 2016 Lahar on Lumbre channel

Movie S3. Movie of the August 30 2016 Lahar on Lumbre channel

Movie S4. Movie of the September 9 2016 Lahar on Lumbre channel
